# Supplementary material
Source: Springer Nature journal article supplement (https://www.springermedizin.de/resource/supplementary/12885_2011_2848_MOESM4_ESM.pdf/9462082)

Martin et al.
  Burstein et al
  CARL-Trial

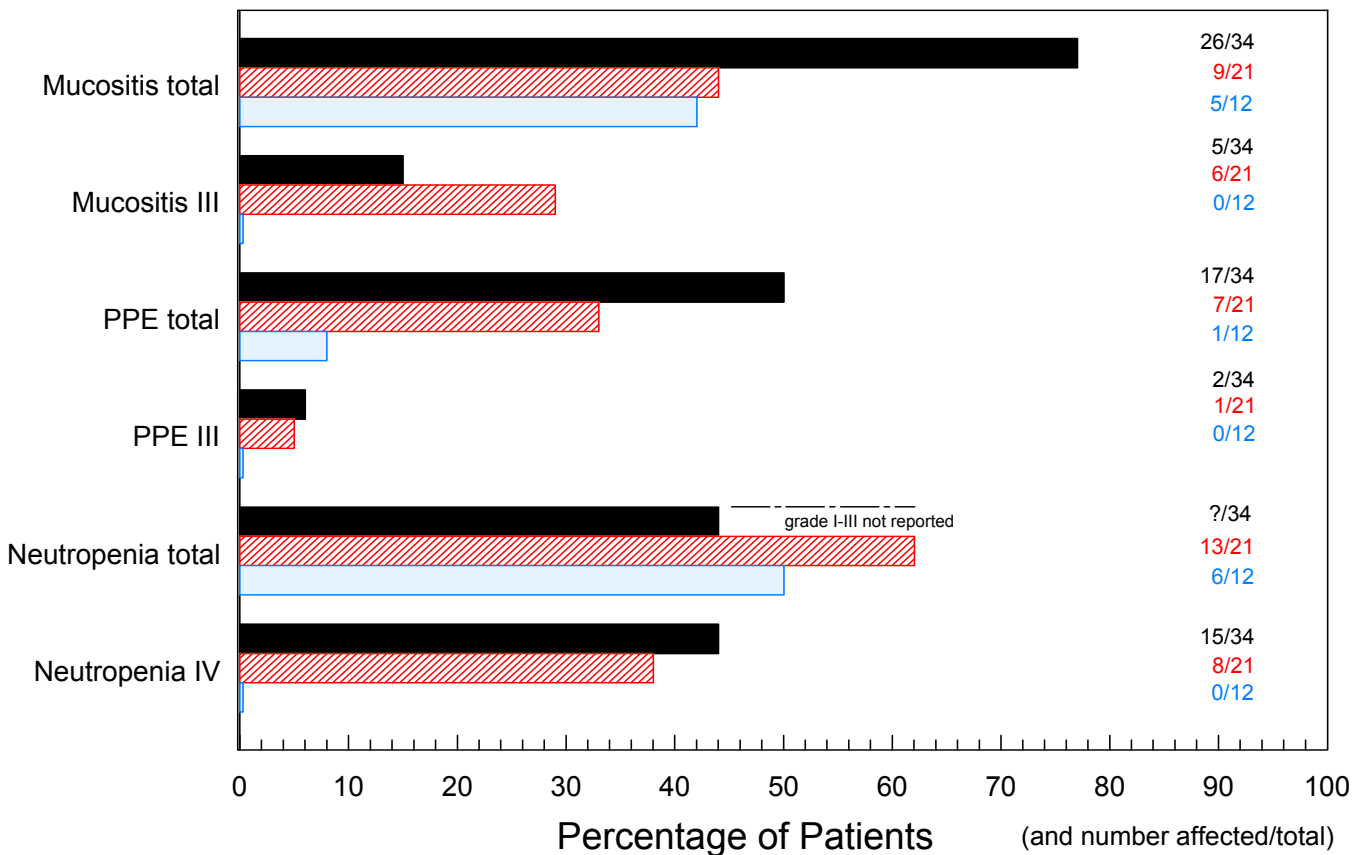

Supplement: MOESM4 [file 9462082]
